# Supplementary material for: Morphological evaluation of polysaccharide content and collagen composition during cutaneous wound healing in the Sunda porcupine (Hystrix javanica)
Source: PubMed Central journal article supplement — J Vet Med Sci. 2020 Mar 26;82(5):506–15. doi: 10.1292/jvms.19-0603 (PMC7273595; doi:10.1292/jvms.19-0603), 2020-03-26
Supplement: jvms-82-506-s001.pdf [file jvms-82-506-s001.pdf]

**Supplementary Table 1.** Thickness of epidermis

| Region               | Days               |                    |                     |                       |                     |                      |                     |                     |
|----------------------|--------------------|--------------------|---------------------|-----------------------|---------------------|----------------------|---------------------|---------------------|
|                      | 0                  | 3                  | 7                   | 14                    | 21                  | 30                   | 40                  | 50                  |
| TD ( $\mu\text{m}$ ) | 41.44 <sup>a</sup> | 93.64 <sup>c</sup> | 139.19 <sup>h</sup> | 136.79 <sup>def</sup> | 175.78 <sup>i</sup> | 128.49 <sup>fg</sup> | 175.74 <sup>h</sup> | 73.99 <sup>ef</sup> |
| LS ( $\mu\text{m}$ ) | 34.66 <sup>a</sup> | 108.9 <sup>d</sup> | 142.19 <sup>g</sup> | 121.56 <sup>de</sup>  | 199.51 <sup>j</sup> | 191.33 <sup>ij</sup> | 136.81 <sup>g</sup> | 125.37 <sup>b</sup> |

Different superscript letter in column and row differ significantly at  $p < 0.05$

## Supplementary Table 2.

Average percentage of collagen type I and III in wound healing process of sunda porcupine

| Skin parts             | Collage<br>n | Regio<br>n | Days of observation    |                       |                         |                       |                        |                       |                        |                                   |
|------------------------|--------------|------------|------------------------|-----------------------|-------------------------|-----------------------|------------------------|-----------------------|------------------------|-----------------------------------|
|                        |              |            | 0                      | 3                     | 7                       | 14                    | 21                     | 30                    | 40                     | 50                                |
| Normal<br>dermis       | I            | TD         | 51.30 <sup>cdef</sup>  | 52.40 <sup>cdef</sup> | 38.37 <sup>abc</sup>    | 33.30 <sup>a</sup>    | 54.99 <sup>def</sup>   | 50.99 <sup>cdef</sup> | 63.32 <sup>f</sup>     | 34.64 <sup>ab</sup>               |
|                        |              | LS         | 45.21 <sup>abcde</sup> | 58.26 <sup>ef</sup>   | 48.43 <sup>abcdef</sup> | 37.88 <sup>abc</sup>  | 49.75 <sup>bcdef</sup> | 62.46 <sup>f</sup>    | 48.77 <sup>bcdef</sup> | 39.55 <sup>abc</sup> <sub>d</sub> |
|                        | III          | TD         | 20.78 <sup>cde</sup>   | 15.06 <sup>abc</sup>  | 11.93 <sup>ab</sup>     | 9.54 <sup>a</sup>     | 16.89 <sup>bcd</sup>   | 30.55 <sup>f</sup>    | 18.83 <sup>cde</sup>   | 15.24 <sup>abc</sup>              |
|                        |              | LS         | 34.47 <sup>f</sup>     | 18.31 <sup>bcd</sup>  | 17.38 <sup>bcd</sup>    | 15.83 <sup>abcd</sup> | 23.74 <sup>def</sup>   | 25.43 <sup>ef</sup>   | 14.15 <sup>abc</sup>   | 20.53 <sup>cde</sup>              |
| Wound<br>border        | I            | TD         |                        | 40.87 <sup>bcd</sup>  | 45.81 <sup>cd</sup>     | 35.42 <sup>abc</sup>  | 43.49 <sup>cd</sup>    | 36.18 <sup>abcd</sup> | 44.14 <sup>cd</sup>    | 22.25 <sup>a</sup>                |
|                        |              | LS         |                        | 44.30 <sup>cd</sup>   | 41.64 <sup>cd</sup>     | 22.90 <sup>a</sup>    | 53.19 <sup>d</sup>     | 49.45 <sup>cd</sup>   | 43.52 <sup>cd</sup>    | 26.77 <sup>ab</sup>               |
|                        | III          | TD         |                        | 12.67 <sup>abc</sup>  | 13.59 <sup>abc</sup>    | 12.78 <sup>ab</sup>   | 19.84 <sup>bcdef</sup> | 20.62 <sup>def</sup>  | 11.30 <sup>abc</sup>   | 8.71 <sup>a</sup>                 |
|                        |              | LS         |                        | 12.13 <sup>bcde</sup> | 13.79 <sup>abc</sup>    | 9.69 <sup>a</sup>     | 25.83 <sup>f</sup>     | 23.04 <sup>ef</sup>   | 13.87 <sup>abcd</sup>  | 12.50 <sup>abc</sup>              |
| Granulatio<br>n tissue | I            | TD         |                        |                       |                         | 0.90 <sup>ab</sup>    | 2.57 <sup>bc</sup>     | 2.02 <sup>ab</sup>    | 7.62 <sup>c</sup>      | 0.57 <sup>a</sup>                 |
|                        |              | LS         |                        |                       |                         | 0.64 <sup>ab</sup>    | 0.84 <sup>a</sup>      | 2.03 <sup>ab</sup>    | 4.21 <sup>c</sup>      | 0.95 <sup>ab</sup>                |
|                        | III          | TD         |                        |                       |                         | 1.39 <sup>abc</sup>   | 4.15 <sup>d</sup>      | 2.60 <sup>bc</sup>    | 2.12 <sup>cd</sup>     | 0.72 <sup>ab</sup>                |
|                        |              | LS         |                        |                       |                         | 1.40 <sup>abc</sup>   | 2.59 <sup>cd</sup>     | 2.23 <sup>c</sup>     | 1.76 <sup>c</sup>      | 0.98 <sup>a</sup>                 |

Different superscript letter in each column and row of collagen group in skin parts show significantly different at  $p < 0.05$
